# Supplementary material for: Impressive performance of proton-conducting solid oxide fuel cells using a first-generation cathode with tailored cations
Source: Royal Society of Chemistry journal article supplement (doi:10.1039/c9ta06676d), 2019-01-01
Supplement: c9ta06676d1.pdf [file c9ta06676d1.pdf]

## **Impressive performance for proton-conducting solid oxide fuel cells using a first-generation cathode with tailored cations**

Xi Xu <sup>a, 1</sup>, Huiqiang Wang <sup>b, 1</sup>, Jinming Ma <sup>a</sup>, Wenyun Liu <sup>a</sup>, Xianfen Wang <sup>a</sup>, Marco

Fronzi <sup>c\*</sup> and Lei Bi <sup>a\*</sup>

- a. Institute of Materials for Energy and Environment, College of Materials  
Science and Engineering, Qingdao University, Ningxia Road No. 308,  
Qingdao 266071, China
- b. College of Mechanical and Electric Engineering, Hebei Agricultural University,  
Baoding, Hebei 071001, China
- c. International Research Centre for Renewable Energy, State Key Laboratory of  
Multiphase Flow in Power Engineering, Xi'an Jiaotong University, Xi'an,  
China

---

<sup>1</sup>. These authors contributed equally to this paper.

\* Corresponding authors. Tel./Fax: +86-532-85951496

Email address: [marco.fronzi@mail.xjtu.edu.cn](mailto:marco.fronzi@mail.xjtu.edu.cn) (M. Fronzi)

[bilei@qdu.edu.cn](mailto:bilei@qdu.edu.cn) and [bilei81@gmail.com](mailto:bilei81@gmail.com) (L. Bi)

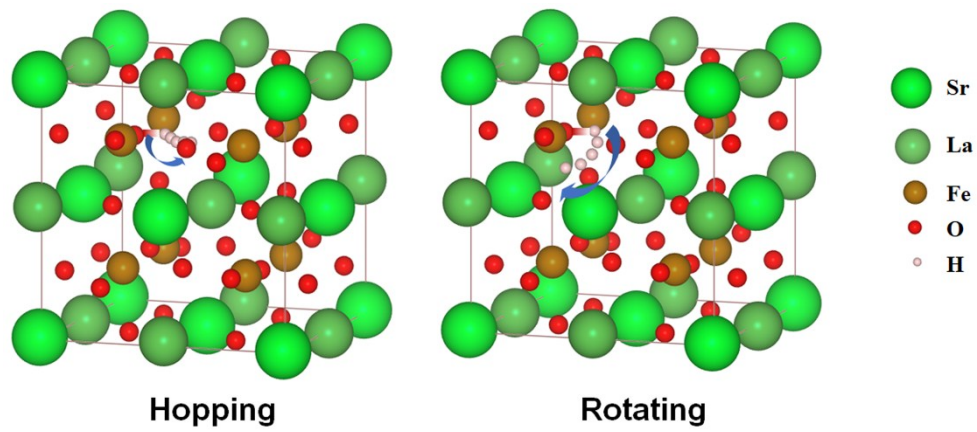

**Figure S1.** Schemes of proton hopping and rotating process in proton migrations for LSF.
